# Supplementary material for: A sustainable natural nanofibrous confinement strategy to obtain ultrafine Co3O4 nanocatalysts embedded in N-enriched carbon fibers for efficient biomass-derivative in situ hydrogenation
Source: Royal Society of Chemistry journal article supplement (doi:10.1039/d0nr04431h), 2020-01-01
Supplement: d0nr04431h1.pdf [file d0nr04431h1.pdf]

## Supplementary Information

**Sustainable natural nanofibrous confinement strategy to ultrafine  $\text{Co}_3\text{O}_4$  nanocatalysts embedded in N-enriched carbon fibers for efficient biomass-derivatives *in situ* hydrogenation**

Shenghui Zhou,<sup>a</sup> and Haisong Qi<sup>\*, a, b</sup>

<sup>a</sup> State Key Laboratory of Pulp and Paper Engineering, South China University of Technology, Guangzhou 510640, China.

<sup>b</sup> Guangdong Engineering Research Centre for Green Fine Chemicals, Guangzhou 510640, China.

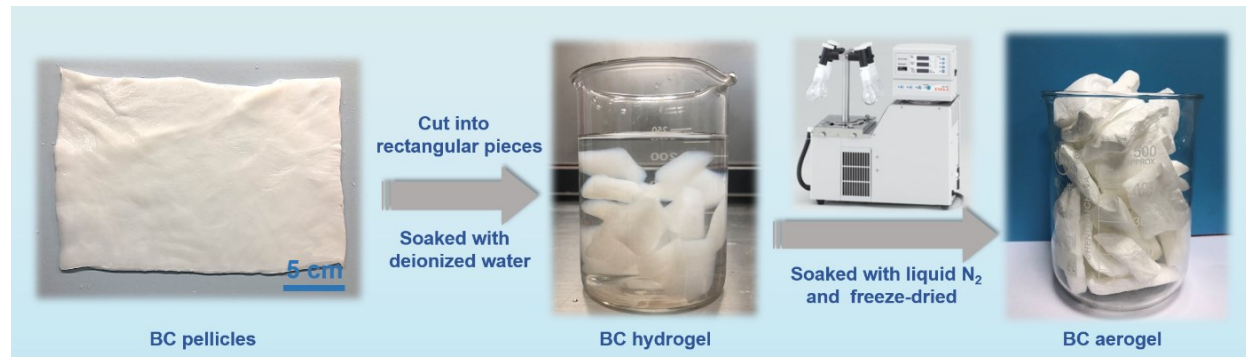

**Fig. S1** Schematic illustration for the preparation of BC aerogel.

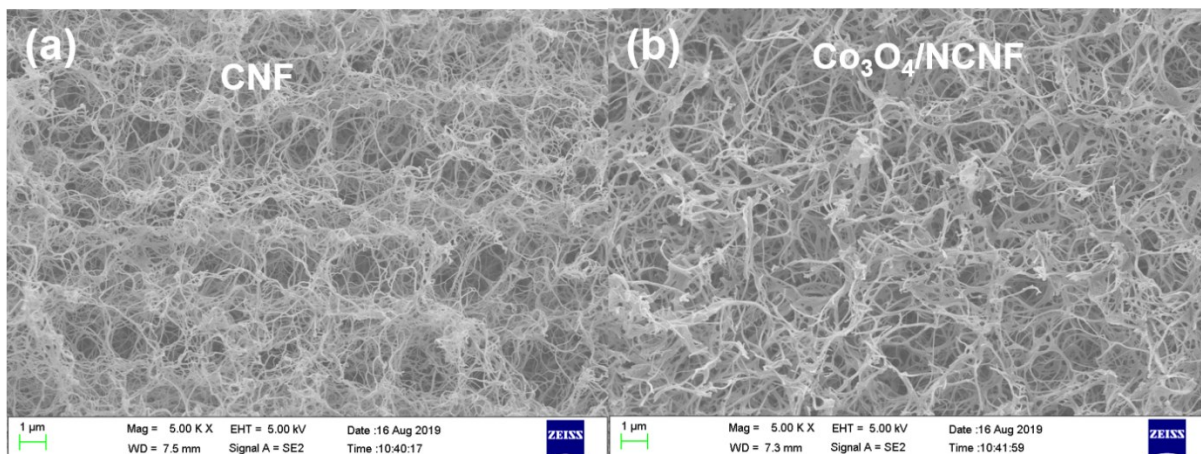

**Fig. S2** SEM images of CNF (a),  $\text{Co}_3\text{O}_4/\text{CNF}$  (b).

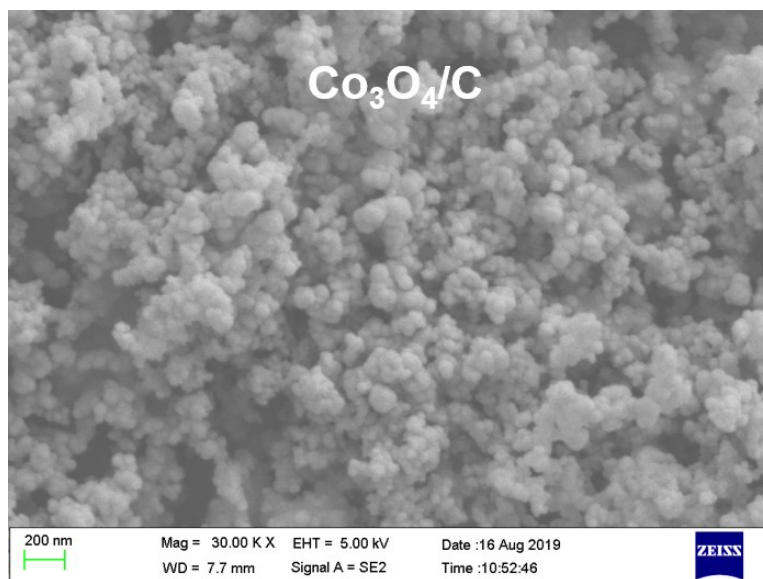

**Fig. S3** SEM images of  $\text{Co}_3\text{O}_4/\text{C}$ .

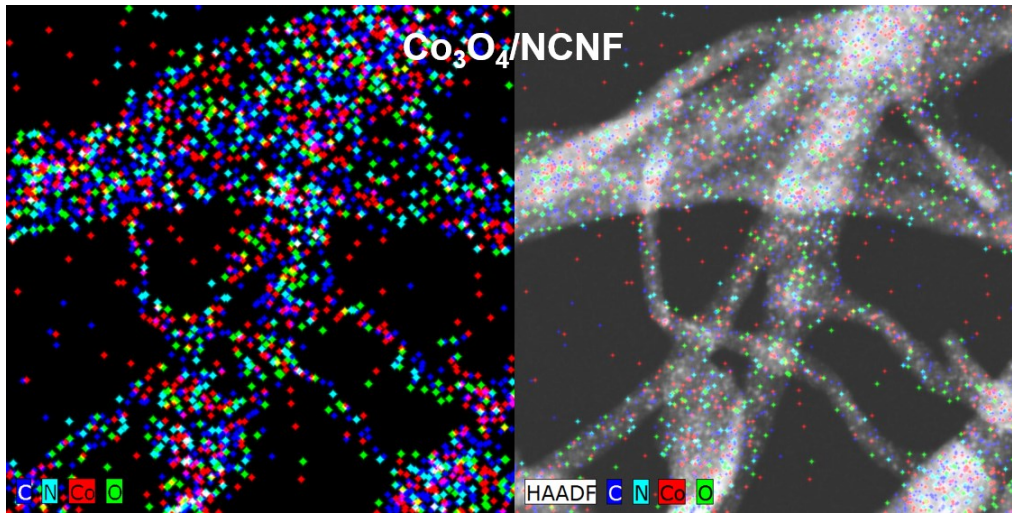

Fig. S4 TEM element mapping images (d) of  $\text{Co}_3\text{O}_4/\text{NCNF}$ .

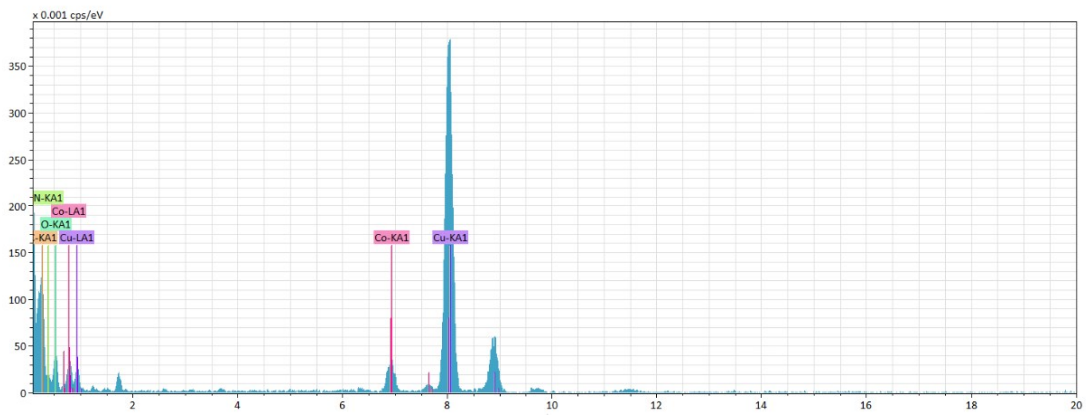

Fig. S5 HRTEM-EDX of  $\text{Co}_3\text{O}_4/\text{NCNF}$ .

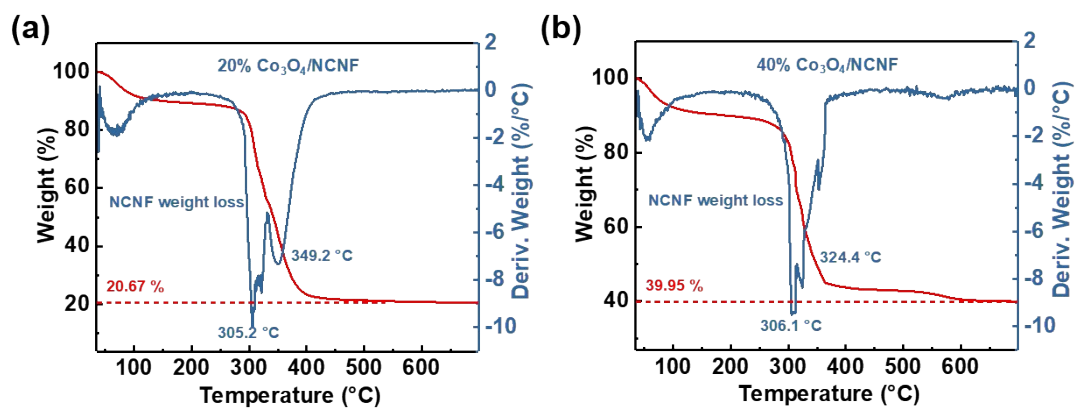

**Figure S6** TG and DTG curves of BC and 20% and 40%  $\text{Co}_3\text{O}_4/\text{NCNF}$ .

**Table S1** The results of elemental analysis for various catalysts

| Catalysts                           | Content (wt.%) <sup>a</sup> |     |     |
|-------------------------------------|-----------------------------|-----|-----|
|                                     | C                           | N   | H   |
| BC                                  | 36.3                        | 1.1 | 5.0 |
| $\text{Co}_3\text{O}_4/\text{C}$    | 43.6                        | 0.4 | 1.1 |
| $\text{Co}_3\text{O}_4/\text{CNF}$  | 44.9                        | 1.2 | 2.1 |
| $\text{Co}_3\text{O}_4/\text{NCNF}$ | 48.4                        | 6.3 | 2.0 |

<sup>a</sup> Determined by elemental analysis.

**Table S2** Catalytic results for different catalysts <sup>a</sup>

| Entry           | Catalysts                             | 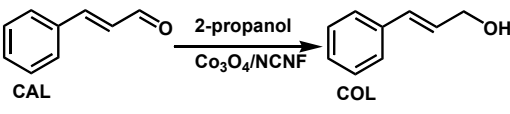 |                           |
|-----------------|---------------------------------------|------------------------------------------------------------------------------------|---------------------------|
|                 |                                       | Conv. (%)                                                                          | COL Sel. (%) <sup>b</sup> |
| 1               | Blank                                 | 0.2                                                                                | 100                       |
| 2               | Co <sub>3</sub> O <sub>4</sub>        | 3.1                                                                                | 99                        |
| 3               | C                                     | 0.4                                                                                | 99                        |
| 4               | CNF                                   | 1.4                                                                                | 99                        |
| 5               | NCNF                                  | 4.6                                                                                | 99                        |
| 6               | Co <sub>3</sub> O <sub>4</sub> /NCNF  | 36.8                                                                               | 99                        |
| 7               | Mn <sub>3</sub> O <sub>4</sub> /NCNF  | 30.25                                                                              | 99                        |
| 8               | Fe <sub>3</sub> O <sub>4</sub> /NCNF  | 8.3                                                                                | 99                        |
| 9               | NiO/NCNF                              | 9.9                                                                                | 99                        |
| 10 <sup>c</sup> | Co <sub>3</sub> O <sub>4</sub> + NCNF | 8.2                                                                                | 99                        |

<sup>a</sup> Reaction conditions: 0.5mmol CAL in 5ml 2-propanol, 50mg catalyst, 160 °C, 3h.

<sup>b</sup> The by product is phenylpropanol. <sup>c</sup> Co<sub>3</sub>O<sub>4</sub> and NCNF were physically mixed.

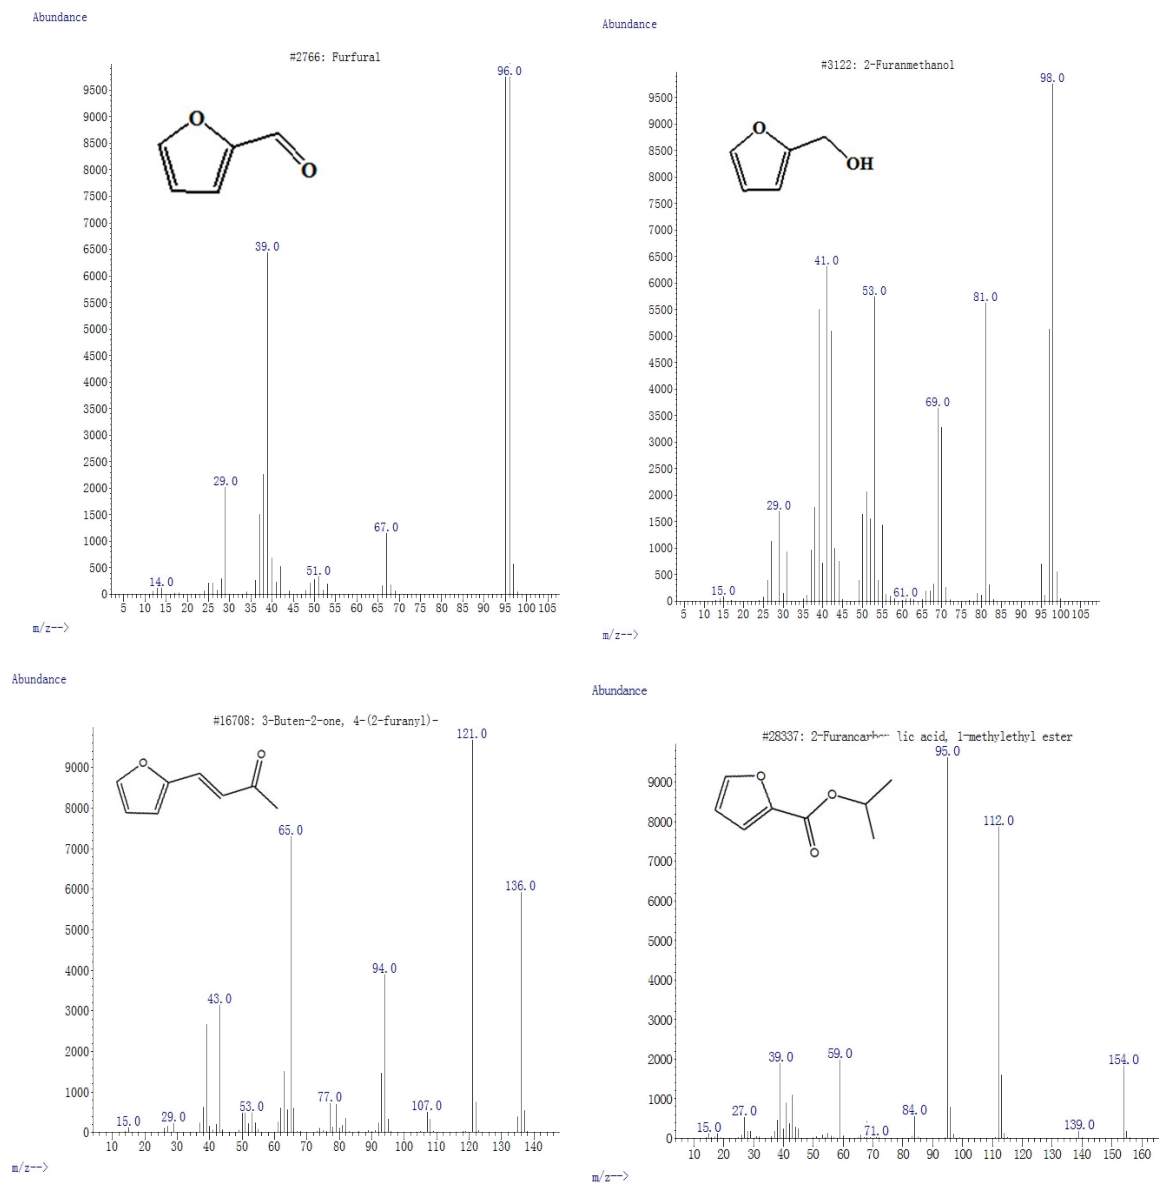

**Fig. S7** Representative MS spectra of the reaction mixture in FAL hydrogenation.

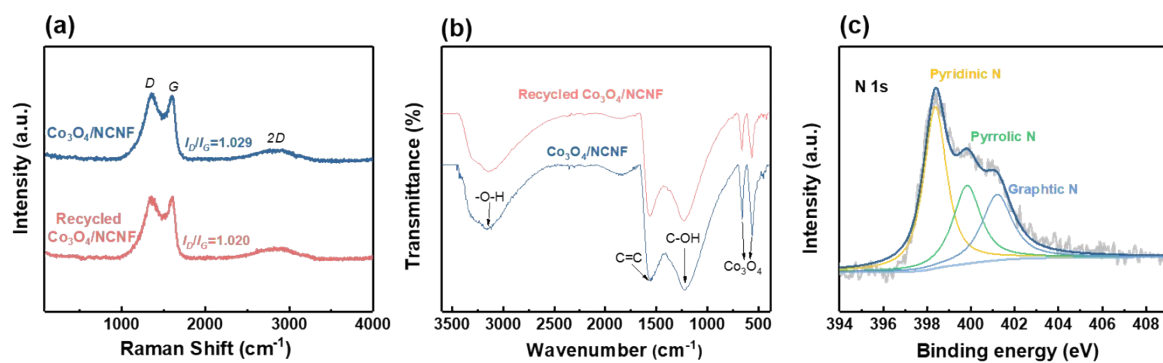

**Fig. S8** Raman spectra (a) and FT-IR spectra (b) of Co<sub>3</sub>O<sub>4</sub>/NCNF before and after the reaction. N 1s spectrum (c) of recycled Co<sub>3</sub>O<sub>4</sub>/NCNF.

**Table S3** The results of elemental analysis for various catalysts

| Catalysts                                     | Content (wt.%)  |                |                |                |
|-----------------------------------------------|-----------------|----------------|----------------|----------------|
|                                               | Co <sup>a</sup> | N <sup>b</sup> | C <sup>b</sup> | O <sup>b</sup> |
| Co <sub>3</sub> O <sub>4</sub> /NCNF          | 2.93            | 4.66           | 79.85          | 12.55          |
| Recycled Co <sub>3</sub> O <sub>4</sub> /NCNF | 2.67            | 4.2            | 76.64          | 16.48          |

<sup>a</sup> Determined by ICP-OES.

<sup>b</sup> Determined by elemental analysis.

**Table S4** The comparison of Co<sub>3</sub>O<sub>4</sub> nanoparticle size with previously reported catalysts.

| Entry | Sample                                    | Co <sub>3</sub> O <sub>4</sub> mean size | Application                         | Ref.      |
|-------|-------------------------------------------|------------------------------------------|-------------------------------------|-----------|
| 1     | Co <sub>3</sub> O <sub>4</sub> /graphene  | 10-30 nm                                 | Lithium-ion batteries               | [1]       |
| 2     | N-doped PC-Co <sub>3</sub> O <sub>4</sub> | 5–10 nm                                  | Lithium-ion batteries               | [2]       |
| 3     | R-Co <sub>3</sub> O <sub>4</sub> /C       | 3-10 nm                                  | Sodium-Ion Batteries                | [3]       |
| 4     | NC-Co <sub>3</sub> O <sub>4</sub>         | 10–20 nm                                 | Zinc–Air Batteries                  | [4]       |
| 5     | Co <sub>3</sub> O <sub>4</sub> /rGO       | 30 nm                                    | Li-ion batteries                    | [5]       |
| 6     | Co <sub>3</sub> O <sub>4</sub> @NCFs      | 3–6 nm                                   | lithium/sodium storage              | [6]       |
| 7     | Co <sub>3</sub> O <sub>4</sub> /N-PC      | 15–30 nm                                 | lithium storage and water splitting | [7]       |
| 8     | NCA/Co <sub>3</sub> O <sub>4</sub>        | 5–35 nm                                  | Supercapacitors                     | [8]       |
| 9     | Co <sub>3</sub> O <sub>4</sub> /CNFs      | 3-5 nm                                   | Supercapacitor                      | [9]       |
| 10    | Co <sub>3</sub> O <sub>4</sub> @C-MWCNTs  | 10–25 nm                                 | OER and ORR                         | [10]      |
| 11    | Co <sub>3</sub> O <sub>4</sub> -CNFs      | 20 - 40 nm                               | Electrodes                          | [11]      |
| 12    | HCo <sub>3</sub> O <sub>4</sub> /C        | 6–12 nm                                  | Peroxymonosulfate activation        | [12]      |
| 13    | Co <sub>3</sub> O <sub>4</sub> @C@PGC     | 10–20 nm                                 | microwave absorber                  | [13]      |
| 14    | Co <sub>3</sub> O <sub>4</sub> -N@C       | 2–10 nm                                  | Catalysts                           | [14]      |
| 15    | CoO <sub>x</sub> @NCNTs                   | 12.9 nm                                  | Catalysts                           | [15]      |
| 16    | Co <sub>3</sub> O <sub>4</sub> /MC        | 3 nm                                     | Catalysts                           | [16]      |
| 17    | Co <sub>3</sub> O <sub>4</sub> /carbon    | 8–25 nm                                  | Catalysts                           | [17]      |
| 18    | ZIF-Co <sub>3</sub> O <sub>4</sub> /NCF   | 5–8 nm                                   | Catalysts                           | [18]      |
| 19    | Co <sub>3</sub> O <sub>4</sub> /NCNFs     | 1.0-2.5 nm                               | Catalysts                           | This work |

## References

1. Z.-S. Wu, W. Ren, L. Wen, L. Gao, J. Zhao, Z. Chen, G. Zhou, F. Li and H.-M. Cheng, *ACS nano*, 2010, **4**, 3187-3194.
2. L. Wang, Y. Zheng, X. Wang, S. Chen, F. Xu, L. Zuo, J. Wu, L. Sun, Z. Li and H. Hou, *ACS Appl. Mater. Interfaces*, 2014, **6**, 7117-7125.
3. M. Xu, Q. Xia, J. Yue, X. Zhu, Q. Guo, J. Zhu and H. Xia, *Adv. Funct. Mater.*, 2019, **29**, 1807377.



4. C. Guan, A. Sumboja, H. Wu, W. Ren, X. Liu, H. Zhang, Z. Liu, C. Cheng, S. J. Pennycook and J. Wang, *Adv. Mater.*, 2017, **29**, 1704117.
5. L. Pan, H. Zhao, W. Shen, X. Dong and J. Xu, *J. Mater. Chem. A*, 2013, **1**, 7159-7166.
6. K. Zhang, F. Xiong, J. Zhou, L. Mai, and L. Zhang, *Nano Energy*, 2020, **67**, 104222.
7. Y. Hou, J. Li, Z. Wen, S. Cui, C. Yuan and J. Chen, *Nano Energy*, 2015, **12**, 1-8.
8. G. Sun, L. Ma, J. Ran, X. Shen and H. Tong, *J. Mater. Chem. A*, 2016, **4**, 9542-9554.
9. S. Abouali, M. Akbari Garakani, B. Zhang, Z.-L. Xu, E. Kamali Heidari, J.-q. Huang, J. Huang and J.-K. Kim, *ACS Appl. Mater. Interfaces*, 2015, **7**, 13503-13511.
10. X. Li, Y. Fang, X. Lin, M. Tian, X. An, Y. Fu, R. Li, J. Jin and J. Ma, *J. Mater. Chem. A*, 2015, **3**, 17392-17402.
11. F. Zhang, C. Yuan, J. Zhu, J. Wang, X. Zhang and X. W. Lou, *Adv. Funct. Mater.*, 2013, **23**, 3909-3915.
12. M. A. N. Khan, P. K. Klu, C. Wang, W. Zhang, R. Luo, M. Zhang, J. Qi, X. Sun, L. Wang and J. Li, *Chem. Eng. J.*, 2019, **363**, 234-246.
13. F. Wen, H. Hou, J. Xiang, X. Zhang, Z. Su, S. Yuan and Z. Liu, *Carbon*, 2015, **89**, 372-377.
14. R. V. Jagadeesh, H. Junge, M.-M. Pohl, J. r. Radnik, A. Brückner and M. Beller, *J. Am. Chem. Soc.*, 2013, **135**, 10776-10782.
15. Z. Wei, J. Wang, S. Mao, D. Su, H. Jin, Y. Wang, F. Xu, H. Li and Y. Wang, *ACS Catal.*, 2015, **5**, 4783-4789.
16. G. H. Wang, X. Deng, D. Gu, K. Chen, H. Tüysüz, B. Spliethoff, H. J. Bongard, C. Weidenthaler, W. Schmidt and F. Schüth, *Angew. Chem., Int. Ed.*, 2016, **128**, 11267-11271.
17. B. M. Abu-Zied and K. A. Alamry, *J. Alloys Compd.*, 2019, **798**, 820-831.
18. L. Song, J. Tang, T. Wang, C. Wu, Y. Ide, J. He and Y. Yamauchi, *Chem. - Eur. J.*, 2019, **25**, 6807-6813.

**Table S5** The comparison of CTH of CAL and FAL with H<sub>2</sub> or H-donor reaction systems with previously reported catalysts.

| Entry | Catalyst                                                        | Substrate | H-donor                              | Reaction conditions                      | Conv. (%) | Sel. of alcohol (%) | Ref.      |
|-------|-----------------------------------------------------------------|-----------|--------------------------------------|------------------------------------------|-----------|---------------------|-----------|
| 1     | 1.0Pt-5.3FeO <sub>x</sub> /SiO <sub>2</sub> -GD                 | CAL       | 1 MPa H <sub>2</sub>                 | 150 °C, 2 h                              | 41        | 92                  | [19]      |
| 2     | Pt-Re/rGO                                                       | CAL       | 2 MPa H <sub>2</sub>                 | 120 °C, 4 h                              | 94.1      | 88.7                | [20]      |
| 3     | Au//In <sub>2</sub> O <sub>3</sub>                              | CAL       | 1 MPa H <sub>2</sub>                 | 180 °C, 18 h                             | 91        | 84                  | [21]      |
| 4     | CoPt/Fe <sub>3</sub> O <sub>4</sub>                             | CAL       | 3 MPa H <sub>2</sub> ,<br>2-propanol | 160 °C, 3 h                              | 95        | 84                  | [22]      |
| 5     | Cu-Au/SiO <sub>2</sub>                                          | CAL       | 2 MPa H <sub>2</sub>                 | 100 °C, 3 h                              | 55.0      | 53.0                | [23]      |
| 6     | Ni-Co/MWCNT                                                     | CAL       | 0.5 MPa H <sub>2</sub>               | 150 °C, 8 h                              | 62.6      | 62.1                | [24]      |
| 7     | Au/Zn <sub>0.7</sub> Fe <sub>0.3</sub> Ox                       | CAL       | 2-propanol,<br>1 MPa H <sub>2</sub>  | 140 °C, 10 h                             | 75.4      | 88.5                | [25]      |
| 8     | ZIF-67@SiO <sub>2</sub> -CPTEOS                                 | CAL       | 2-propanol,<br>1 MPa N <sub>2</sub>  | 180 °C, 18 h                             | 99        | 93.25               | [26]      |
| 9     | 2%Pt-1%Re/TiO <sub>2</sub> -ZrO <sub>2</sub>                    | FAL       | 5 MPa H <sub>2</sub>                 | 130 °C, 8 h                              | 100       | 95.7                | [27]      |
| 10    | Co/SBA-15                                                       | FAL       | 2 MPa H <sub>2</sub>                 | 150 °C, 1 h                              | 80        | 96                  | [28]      |
| 11    | Ni-Sn/AlOH                                                      | FAL       | 3 Mpa H <sub>2</sub>                 | 180 °C, 75 min                           | 95        | 91                  | [29]      |
| 12    | Cu:Zn:Cr:Zr(3:2:1:3)                                            | FAL       | 2 MPa H <sub>2</sub>                 | 170 °C, 3.5 h                            | 100       | 96                  | [30]      |
| 13    | Fe-L4(L5)/C-800                                                 | FAL       | 2-propanol                           | 160 °C, 15 h                             | 91.6      | 83                  | [31]      |
| 14    | LaFeO <sub>3</sub> _N                                           | FAL       | 2-propanol                           | 180 °C, 3 h                              | -         | -                   | [32]      |
| 15    | Pd/Fe <sub>2</sub> O <sub>3</sub>                               | FAL       | 2-propanol                           | 180 °C, 7.5 h                            | 100       | 34                  | [33]      |
| 16    | Cu/MgO-Al <sub>2</sub> O <sub>3</sub>                           | FAL       | 2-propanol                           | 210 °C, 1 h,                             | 100       | 89                  | [34]      |
| 17    | DyCl <sub>3</sub>                                               | FAL       | 2-propanol                           | 180 °C, 3 h,<br>(2Mpa N <sub>2</sub> )   | 98        | 97                  | [35]      |
| 18    | Al <sub>7</sub> Zr <sub>3</sub> @Fe <sub>3</sub> O <sub>4</sub> | FAL       | 2-propanol                           | 180 °C, 4 h                              | 99.1      | 90.5                | [36]      |
| 19    | Fe <sub>2</sub> O <sub>3</sub> @HAP                             | FAL       | 2-propanol                           | 180 °C, 10 h                             | 96.2      | 95.3                | [37]      |
| 20    | NiFe <sub>2</sub> O <sub>4</sub>                                | FAL       | 2-propanol                           | 180 °C, 6 h                              | 99        | 95                  | [38]      |
| 21    | Cu <sub>2</sub> Al                                              | FAL       | methanol                             | 200 °C, 2.5 h,<br>(1Mpa N <sub>2</sub> ) | 100       | 94                  | [39]      |
| 22    | γ-Al <sub>2</sub> O <sub>3</sub>                                | FAL       | 2-propanol                           | 150 °C, 6 h                              | 100       | 90                  | [40]      |
| 23    | e HT_MgFe-3                                                     | FAL       | 2-propanol                           | 170 °C, 6 h                              | 99        | 90                  | [41]      |
| 24    | Co <sub>3</sub> O <sub>4</sub> /NCNF                            | CAL       | 2-propanol                           | 160 °C, 5 h                              | 100       | 95                  | This work |
| 25    | Co <sub>3</sub> O <sub>4</sub> /NCNF                            | FAL       | 2-propanol                           | 160 °C, 2 h                              | 91.0      | 88                  | This work |
| 26    | Co <sub>3</sub> O <sub>4</sub> /NCNF                            | FAL       | 2-propanol                           | 160 °C, 3.5 h                            | 99        | 85                  | This work |

## References

19. Y. Shi, Z. Yuan, Q. Wei, K. Sun and B. Xu, *Catal. Sci. Technol.*, 2016, **6**, 7033-7037.
20. Z. Wei, X. Zhu, X. Liu, H. Xu, X. Li, Y. Hou and Y. Liu, *Chin. J. Chem. Eng.*, 2019, **27**, 369-378.
21. Y. Zhang, S. Zhang, X. Pan, M. Bao, J. Huang and W. Shen, *Catal. Lett.*, 2017, **147**, 102-109.
22. T. Yuan, D. Liu, Y. Pan, X. Pu, Y. Xia, J. Wang and W. Xiong, *Catal. Lett.*, 2019, **149**, 851-859.
23. X. Yuan, J. Zheng, Q. Zhang, S. Li, Y. Yang and J. Gong, *AIChE J.*, 2014, **60**, 3300-3311.
24. L. J. Malobela, J. Heveling, W. G. Augustyn and L. M. Cele, *Ind. Eng. Chem. Res.*, 2014, **53**, 13910-13919.
25. W. Wang, Y. Xie, S. Zhang, X. Liu, M. Haruta and J. Huang, *Catalysts*, 2018, **8**, 60.
26. H. Cui, S. Liu, Y. Lv, S. Wu, L. Wang, F. Hao, P. Liu, W. Xiong and H. Luo, *J. Catal.*, 2020, **381**, 468-481.
27. B. Chen, F. Li, Z. Huang, G. Yuan, *Appl. Catal., A: Gen.*, 2015, **500**, 23-29.
28. M. Audemar, C. Ciotonea, O.V.K. De, S. Royer, A. Ungureanu, B. Dragoi, E. Dumitriu, F. Jérôme, *ChemSusChem*, 2015, **8**, 1885-1891.
29. Rodiansonoa, M. D. Astuti, D. R. Mujiyanti, U. T. Santoso, S. Shimazu, *Mol. Catal.*, 2018, **445**, 52-60.
30. R.V. Sharma, U. Das, R. Sammynaiken, A.K. Dalai, *Appl. Catal., A: Gen.*, 2013, **454**, 127-136.
31. J. Li, J.L. Liu, H.J. Zhou, Y. Fu, *ChemSusChem*, 2016, **9**, 1339-1347.
32. P. Xiao, X. Xu, J. Zhu, Y. Zhu, *J. Catal.* 2020, **383**, 88-96.
33. D. Scholz, C. Aellig, I. Hermans, *ChemSusChem*, 2014, **7**, 268-275.
34. H. Chen, H. Ruan, X. Lu, J. Fu, T. Langrish, X. Lu, *Mol. Catal.*, 2018, **445**, 94-101.
35. P. Panagiotopoulou, N. Martin, D.G. Vlachos, *ChemSusChem*, 2015, **8**, 17-24.
36. J. He, H. Li, A. Riisager, S. Yang, *ChemCatChem*, 2018, **10**, 430-438.
37. F. Wang, Z. Zhang, *ACS Sustainable Chem. Eng.*, 2016, **5**, 942-947.
38. J. He, S. Yang, A. Riisager, *Catal. Sci. Technol.*, 2017, **8**, 790-797.
39. J. Zhang, J. Chen, *ACS Sustainable Chem. Eng.*, 2017, **5**, 5982-5993.
40. R. López-Asensioa, J.A.Cecilia, C.P. Jiménez-Gómez, C. García-Sanchob, R. Moreno-Tosta, P. Maireles-Torresa, *Appl. Catal., A: Gen.*, 2018, **556**, 1-9.
41. R. Maderuelo-Solera, R. López-Asensio, J.A. Cecilia, C.P. Jiménez-Gómez, C. García-Sancho, R. Moreno-Tost, P. Maireles-Torres, *Appl. Clay Sci.*, 2019, **183**, 105351.
